# Supplementary material
Source: bioRxiv or medRxiv preprint supplement (https://medrxiv.org/highwire/filestream/91421/field_highwire_adjunct_files/0/2020.07.25.20162107-1.pdf)
Supplement: Supplementary file [file 2020.07.25.20162107-1.pdf]

Supplementary Figure 1. Pooled mean duration (days) of MERS-CoV shedding from the upper respiratory tract (random-effects model).

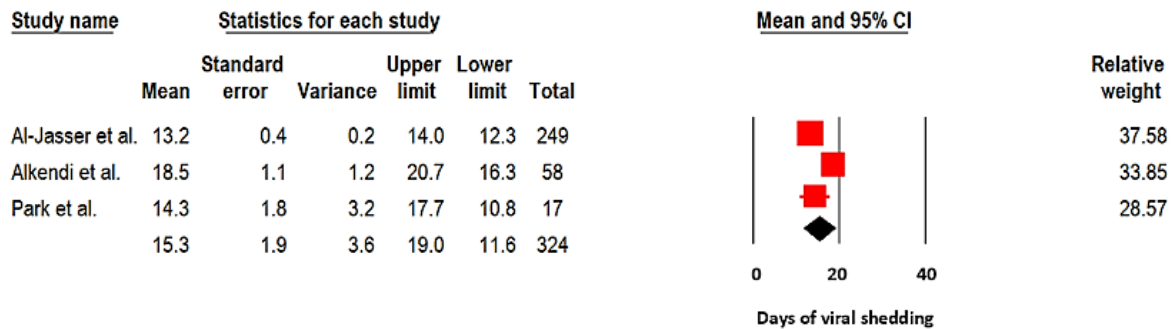

Note: the overall effect is plotted as a black square.

Test for heterogeneity: Q-value = 19.9, df(Q) = 2, p < 0.001, I<sup>2</sup> = 89.9%.

Supplementary Figure 2 Pooled mean duration (days) of MERS-CoV shedding from the lower respiratory tract (random-effects model).

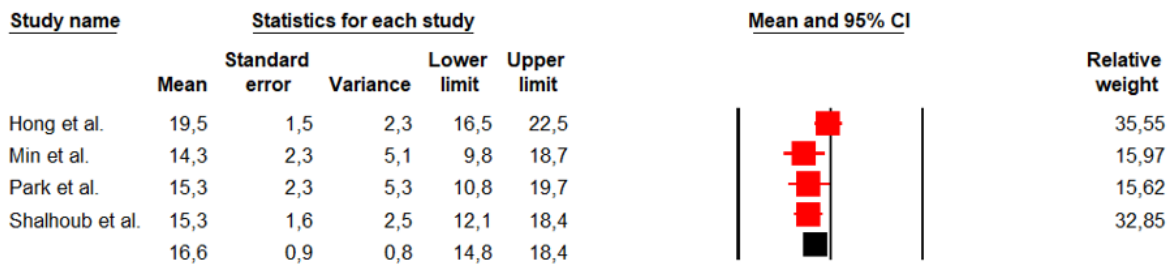

Note: the overall effect is plotted as a black square.

Test for heterogeneity: Q-value = 5,8, df(Q) = 3, p= 0.132, I<sup>2</sup> = 48%.

Supplementary Figure 3. Meta-regression bubble plot of the impact of male proportion on mean SARS-CoV-2 shedding from the upper respiratory tract

**Regression of Mean (Days of viral shedding of SARS-CoV-2 from URT) on Gender, Male %**

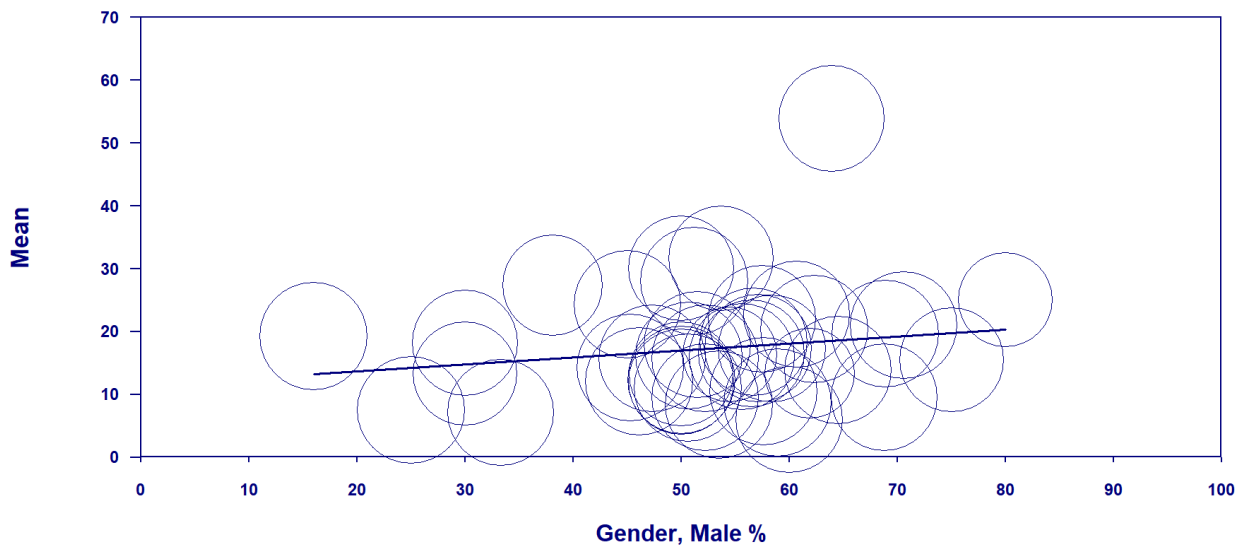

URT: upper respiratory tract.

Note: the plot was built upon 41 observations (no data on mean age from the study of Qian et al.). A random-effects model was used.

Supplementary Figure 4. Meta-regression bubble plot of the impact of age on mean SARS-CoV-2 shedding from the stool

**Regression of Mean (Days of viral shedding in stool in SARS-CoV-2 infection) on Mean Age**

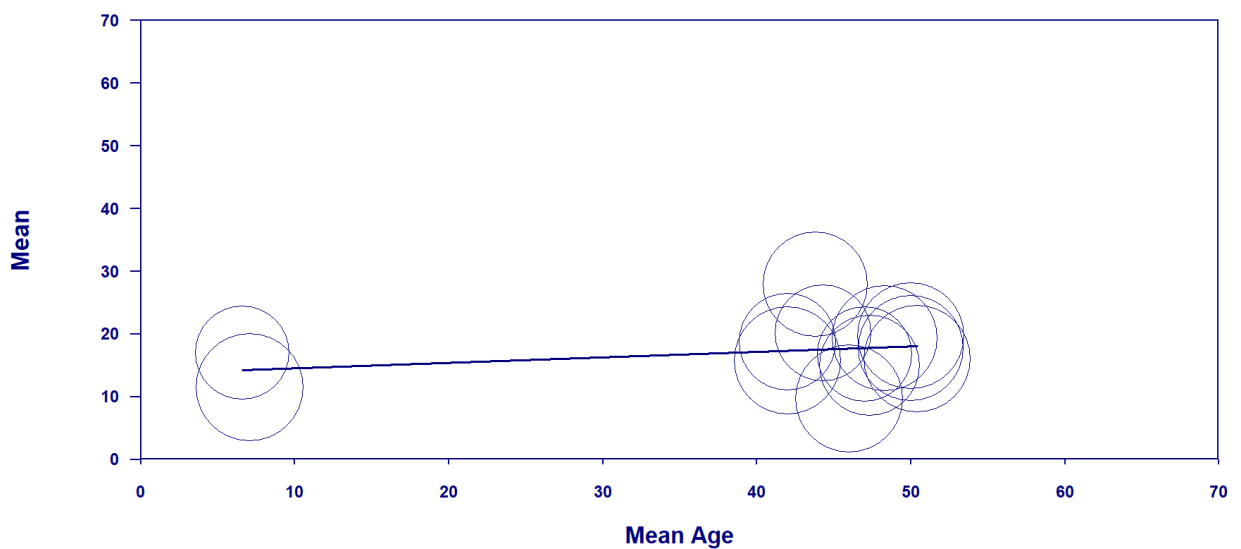

Note: the plot was built upon 13 studies. A random-effects model was used.

(slope: +0.087; 95% CI, -0.128 to +0.302; p = 0.43)

# Critical Appraisal

## CASE SERIES

### SARS-CoV-2

|  | 1. Were there clear criteria for inclusion in the case series? | 2. Was the condition measured in a standard, reliable way for all participants included in the case series? | 3. Were valid methods used for identification of the condition for all participants included in the case series? | 4. Did the case series have consecutive inclusion of participants? | 5. Did the case series have complete inclusion of participants? | 6. Was there clear reporting of the demographic information of the participants in the study? | 7. Was there clear reporting of clinical information of the participants? | 8. Were the outcomes or follow up clearly reported? | 9. Was there clear reporting of the presenting site(s)/clinic(s) demographic information? | 10. Was statistical analysis appropriate? |
|--|----------------------------------------------------------------|-------------------------------------------------------------------------------------------------------------|------------------------------------------------------------------------------------------------------------------|--------------------------------------------------------------------|-----------------------------------------------------------------|-----------------------------------------------------------------------------------------------|---------------------------------------------------------------------------|-----------------------------------------------------|-------------------------------------------------------------------------------------------|-------------------------------------------|
|--|----------------------------------------------------------------|-------------------------------------------------------------------------------------------------------------|------------------------------------------------------------------------------------------------------------------|--------------------------------------------------------------------|-----------------------------------------------------------------|-----------------------------------------------------------------------------------------------|---------------------------------------------------------------------------|-----------------------------------------------------|-------------------------------------------------------------------------------------------|-------------------------------------------|

|                    |   |   |   |   |   |   |   |   |   |    |
|--------------------|---|---|---|---|---|---|---|---|---|----|
| Andersson M et al. | Y | Y | Y | N | N | Y | Y | Y | Y | Y  |
| Bullard J et al.   | Y | Y | Y | N | U | Y | N | Y | N | Y  |
| Cai J et al.       | Y | Y | Y | Y | Y | Y | Y | Y | Y | NA |
| Cai Q et al.       | Y | Y | Y | Y | Y | Y | Y | Y | Y | Y  |
| Chang D et al.     | Y | U | U | Y | Y | Y | Y | Y | Y | Y  |
| Chau N et al.      | Y | Y | Y | Y | N | Y | Y | Y | Y | Y  |
| Chen J et al.      | Y | Y | Y | U | U | Y | Y | Y | Y | Y  |
| Chen X et al.      | Y | Y | Y | N | Y | Y | Y | Y | Y | Y  |
| Chen X et al.      | Y | Y | Y | Y | Y | Y | Y | Y | Y | Y  |
| Chen Y et al.      | Y | Y | Y | U | Y | Y | Y | Y | Y | Y  |
| Corman V et al.    | N | Y | Y | N | N | N | Y | Y | N | NA |
| Fan L et al.       | Y | Y | Y | Y | Y | Y | Y | Y | Y | Y  |
| Fang Z et al.      | U | Y | Y | N | U | Y | Y | Y | Y | Y  |
| Fu S et al.        | Y | Y | Y | Y | Y | Y | Y | Y | Y | Y  |
| Han M et al.       | Y | Y | Y | Y | Y | Y | Y | Y | Y | N  |
| He X et al.        | Y | Y | Y | Y | Y | Y | Y | Y | Y | Y  |
| Hu X et al.        | Y | Y | Y | N | U | Y | Y | Y | Y | Y  |
| Hu Z et al.        | Y | Y | Y | N | Y | Y | Y | Y | Y | Y  |
| Huang H et al.     | Y | Y | Y | U | Y | Y | Y | Y | Y | Y  |
| Huang J et al.     | Y | U | U | U | U | Y | Y | Y | Y | Y  |
| Kim E et al.       | Y | Y | Y | Y | Y | Y | Y | Y | Y | Y  |
| Kujawski S et al.  | Y | Y | Y | U | U | Y | Y | Y | N | Y  |

|                     |   |   |   |   |   |   |   |   |   |    |
|---------------------|---|---|---|---|---|---|---|---|---|----|
| L'Huillier A et al. | Y | Y | Y | N | Y | Y | N | Y | N | Y  |
| La Scola B et al.   | N | Y | Y | N | U | N | N | Y | N | Y  |
| Le T et al.         | Y | Y | Y | U | Y | Y | N | Y | Y | NA |
| Li N et al.         | Y | Y | Y | N | Y | Y | Y | N | Y | Y  |
| Liang M et al.      | Y | Y | Y | N | U | Y | Y | Y | Y | Y  |
| Ling Y et al.       | Y | Y | Y | N | Y | Y | Y | Y | Y | Y  |
| Liu L et al.        | Y | Y | Y | Y | Y | Y | Y | Y | Y | Y  |
| Liu Y et al.        | Y | Y | Y | U | U | Y | Y | Y | Y | Y  |
| Lo I et al.         | Y | Y | Y | N | N | Y | Y | Y | Y | Y  |
| Lou B et al.        | Y | Y | Y | N | Y | Y | N | Y | Y | Y  |
| Pongpirul W et al.  | Y | Y | Y | N | N | Y | Y | Y | Y | Y  |
| Qian G et al.       | Y | Y | Y | N | N | N | N | Y | N | NA |
| Quan W et al.       | Y | Y | Y | N | N | Y | Y | Y | Y | Y  |
| Sakurai A et al.    | Y | Y | Y | Y | Y | Y | Y | Y | Y | Y  |
| Seah I et al.       | U | Y | Y | N | U | Y | Y | Y | N | NA |
| Shastri A et al.    | Y | Y | Y | N | U | Y | Y | Y | Y | Y  |
| Shi J et al.        | Y | Y | Y | N | U | Y | N | Y | Y | Y  |
| Song C et al.       | N | Y | Y | N | N | Y | Y | Y | N | NA |
| Song R et al.       | Y | Y | Y | N | Y | Y | Y | Y | Y | Y  |
| Talmy T et al.      | Y | Y | Y | N | Y | Y | Y | Y | Y | Y  |
| Tan L et al.        | Y | Y | Y | N | Y | Y | Y | Y | Y | Y  |
| Tan W et al.        | Y | Y | Y | Y | Y | Y | Y | Y | Y | Y  |
| Tan Y et al.        | Y | Y | Y | U | Y | Y | Y | Y | Y | Y  |
| Tian D et al.       | Y | Y | Y | U | U | Y | Y | Y | Y | Y  |
| To K et al.         | Y | Y | Y | N | N | Y | N | Y | N | NA |
| Tu Y et al.         | Y | Y | Y | Y | Y | Y | Y | Y | Y | Y  |
| Wang L et al.       | Y | Y | Y | Y | Y | Y | Y | Y | Y | Y  |
| Wang S et al.       | Y | Y | Y | N | U | Y | Y | Y | Y | Y  |
| Wolfel R et al.     | N | Y | Y | N | N | N | Y | Y | U | Y  |
| Wu B et al.         | Y | Y | Y | Y | Y | Y | Y | Y | Y | Y  |
| Wu Q et al.         | Y | Y | Y | U | U | Y | Y | Y | Y | Y  |

|                   |   |   |   |   |   |   |   |   |   |    |
|-------------------|---|---|---|---|---|---|---|---|---|----|
| Wu Y et al.       | Y | Y | Y | N | N | Y | Y | Y | Y | Y  |
| Wyllie A et al.   | Y | Y | Y | U | N | Y | Y | Y | Y | Y  |
| Xiao A et al.     | Y | Y | Y | U | Y | Y | N | Y | Y | Y  |
| Xiao F et al.     | N | Y | Y | U | U | N | N | Y | Y | NA |
| Xu L et al.       | N | Y | Y | U | U | Y | Y | Y | N | NA |
| Xu Y et al.       | Y | Y | Y | Y | Y | Y | Y | Y | Y | Y  |
| Yan D et al.      | Y | Y | Y | N | Y | Y | Y | Y | Y | Y  |
| Yang R et al.     | Y | Y | Y | Y | Y | Y | Y | Y | Y | Y  |
| Yang Y et al.     | Y | Y | Y | U | U | Y | N | Y | Y | Y  |
| Yongchen Z et al. | U | Y | Y | N | N | Y | N | Y | Y | U  |
| Young B et al.    | Y | Y | Y | Y | Y | Y | Y | Y | Y | Y  |
| Zha L et al.      | Y | Y | Y | N | Y | Y | Y | Y | Y | Y  |
| Zhang N et al     | Y | U | Y | U | U | Y | Y | Y | N | Y  |
| Zhang Z et al.    | Y | Y | Y | U | Y | Y | Y | Y | Y | Y  |
| Zhou B et al.     | Y | Y | Y | U | U | Y | N | Y | Y | Y  |
| Zhou F et al      | Y | Y | Y | Y | Y | Y | Y | Y | Y | Y  |
| Zhou R et al.     | Y | Y | Y | U | U | Y | N | Y | Y | Y  |
| Zhu L et al.      | Y | Y | Y | U | U | Y | Y | Y | Y | Y  |
| Zou L et al.      | U | Y | Y | U | U | Y | Y | Y | U | Y  |

**SARS-CoV-1**

|                 |   |   |   |   |   |   |   |   |   |   |
|-----------------|---|---|---|---|---|---|---|---|---|---|
| Chan P et al.   | Y | Y | Y | N | N | Y | N | Y | N | Y |
| Chen W et al.   | Y | Y | Y | N | N | Y | N | Y | N | Y |
| Cheng P et al.  | Y | Y | Y | N | U | N | N | Y | N | Y |
| Kwan B et al.   | Y | Y | Y | U | Y | Y | Y | Y | N | Y |
| Leong H et al.  | Y | Y | Y | N | U | Y | N | Y | N | Y |
| Liu W et al.    | Y | Y | Y | N | N | Y | Y | Y | N | Y |
| Peiris J et al. | Y | Y | Y | U | N | Y | Y | Y | Y | Y |
| Xu D et al.     | Y | Y | Y | U | U | N | N | Y | Y | Y |

**MERS**

|                    |   |   |   |   |   |   |   |   |   |   |
|--------------------|---|---|---|---|---|---|---|---|---|---|
| Al Hosani F et al. | Y | Y | Y | N | Y | Y | Y | Y | N | Y |
| Al-Jasser F et al. | Y | Y | Y | U | Y | Y | Y | Y | Y | Y |

|                  |   |   |   |   |   |   |   |   |   |   |    |
|------------------|---|---|---|---|---|---|---|---|---|---|----|
| Alkendi F et al. | Y | Y | Y | U | Y | Y | Y | Y | Y | Y | NA |
| Corman V et al.  | Y | Y | Y | U | U | Y | N | Y | N | Y | Y  |
| Hong K et al.    | Y | Y | Y | Y | Y | Y | Y | Y | N | Y | Y  |
| Min C-K et al.   | Y | Y | Y | N | U | Y | Y | Y | N | Y | Y  |
| Muth D et al.    | Y | Y | Y | U | U | Y | N | Y | Y | Y | Y  |
| Oh M et al.      | Y | Y | Y | Y | Y | N | N | Y | Y | Y | Y  |
| Park W et al.    | Y | Y | Y | U | U | N | N | Y | Y | Y | Y  |

**COHORT**

| Author | 1. Were the two groups similar and recruited from the same population? | 2. Were the exposures measured similarly to both exposed and unexposed groups? | 3. Was the exposure measured in a valid and reliable way? | 4. Were confounding factors identified? | 5. Were strategies to deal with confounding factors stated? | 6. Were the groups/participants free of the outcome at the start of the study (or at the moment of exposure)? | 7. Were the outcomes measured in a valid and reliable way? | 8. Was the follow up time reported and sufficient to belong enough for outcomes to occur? | 9. Was follow up complete, and if not, were the reasons to loss to follow up described and explored? | 10. Were strategies to address incomplete follow up utilized? | 11. Was appropriate statistical analysis used? |
|--------|------------------------------------------------------------------------|--------------------------------------------------------------------------------|-----------------------------------------------------------|-----------------------------------------|-------------------------------------------------------------|---------------------------------------------------------------------------------------------------------------|------------------------------------------------------------|-------------------------------------------------------------------------------------------|------------------------------------------------------------------------------------------------------|---------------------------------------------------------------|------------------------------------------------|
|--------|------------------------------------------------------------------------|--------------------------------------------------------------------------------|-----------------------------------------------------------|-----------------------------------------|-------------------------------------------------------------|---------------------------------------------------------------------------------------------------------------|------------------------------------------------------------|-------------------------------------------------------------------------------------------|------------------------------------------------------------------------------------------------------|---------------------------------------------------------------|------------------------------------------------|

**SARS-CoV-2**

|                |    |    |   |   |   |    |   |   |    |    |   |
|----------------|----|----|---|---|---|----|---|---|----|----|---|
| Huang L et al. | Y  | Y  | Y | Y | Y | Y  | Y | Y | NA | NA | Y |
| To K et al     | NA | NA | Y | Y | N | NA | Y | Y | Y  | NA | Y |
| Xu K et al     | NA | NA | Y | Y | Y | NA | Y | Y | Y  | NA | Y |
| Zheng S et al  | NA | NA | Y | Y | Y | NA | Y | Y | Y  | NA | Y |

**MERS**

|                   |   |   |   |   |   |   |   |   |   |   |   |
|-------------------|---|---|---|---|---|---|---|---|---|---|---|
| Arabi Y et al.    | N | Y | Y | Y | Y | Y | Y | Y | U | U | Y |
| Shalhoub S et al. | Y | Y | Y | Y | Y | Y | Y | Y | U | U | Y |

**CROSS SECTIONAL STUDIES**

**SARS-CoV-2**

| Author          | 1. Were the criteria for inclusion in the sample clearly defined? | 2. Were the study subjects and the setting described in detail? | 3. Was the exposure measured in a valid and reliable way? | 4. Were objective, standard criteria used for measurement of the condition? | 5. Were confounding factors identified? | 6. Were strategies to deal with confounding factors stated? | 7. Were the outcomes measured in a valid and reliable way? |
|-----------------|-------------------------------------------------------------------|-----------------------------------------------------------------|-----------------------------------------------------------|-----------------------------------------------------------------------------|-----------------------------------------|-------------------------------------------------------------|------------------------------------------------------------|
| Arons M et al   | Y                                                                 | Y                                                               | Y                                                         | Y                                                                           | N                                       | Y                                                           | Y                                                          |
| Lavezzo E et al | Y                                                                 | Y                                                               | Y                                                         | Y                                                                           | Y                                       | Y                                                           | Y                                                          |



## Search strategy

**Research question:** What is the duration and dynamics of viral shedding in various body fluids in coronaviruses?

### Search methods:

The following databases will be searched: MEDLINE and EMBASE. For the following conferences we will hand search abstracts: European Congress of Clinical Microbiology and Infectious Diseases (ECCMID). Additionally, if any literature reviews are identified, reference lists of those review articles will be searched.

**Time:** the search will be limited to literature published after 2003, since the first recognised case of SARS was identified in March 2003.

**Language:** only English language articles will be reviewed.

### Search terms:

1. nCoV or n-Cov
2. 2019-nCoV
3. coronavirus disease 2019
4. coronavirus disease-19
5. novel coronavirus
6. COVID
7. COVID-19
8. Middle East Respiratory Syndrome Coronavirus/
9. Middle East respiratory syndrome
10. MERS
11. SARS Virus/
12. SARS
13. severe acute respiratory syndrome
14. 1 or 2 or 3 or 4 or 5 or 6 or 7 or 8 or 9 or 10 or 11 or 12 or 13
15. shed\* OR viabl\*
16. viral OR virus OR rna OR ribonucleic
17. viral shedding
18. 15 or 16 or 17
19. 14 AND 18
